# Supplementary material
Source: PubMed Central journal article supplement (PMC8453659)
Supplement: NIHMS903913-supplement-supplement_1.pdf [file NIHMS903913-supplement-supplement_1.pdf]

**Table 1S.** Characteristics of patients by center volume of VAD implants in Profiles 1-2 only

|                                                     | Center Volume  |                  |                  |                | p      |
|-----------------------------------------------------|----------------|------------------|------------------|----------------|--------|
|                                                     | ≤10<br>(n=215) | 11-30<br>(n=878) | 31-50<br>(n=782) | >50<br>(n=790) |        |
| <b>Age ≥70 years, n(%)</b>                          | 57 (20%)       | 165 (13%)        | 113 (9%)         | 97 (12%)       | <0.001 |
| <b>Male, n(%)</b>                                   | 227 (80%)      | 1006 (78%)       | 928 (78%)        | 684 (75%)      | 0.30   |
| <b>Ischemic myopathy,<br/>n(%)</b>                  | 146 (52%)      | 556 (43%)        | 513 (43%)        | 424 (46%)      | 0.024  |
| <b>Prior cardiac surgery,<br/>n(%)</b>              | 100 (35%)      | 361 (28%)        | 398 (33%)        | 303 (33%)      | 0.008  |
| <b>BTT listed, n(%)</b>                             | 55 (19%)       | 343 (26%)        | 310 (26%)        | 235 (26%)      | 0.095  |
| <b>INTERMACS Profile</b>                            |                |                  |                  |                | <0.001 |
| 1                                                   | 80 (28%)       | 311 (24%)        | 356 (30%)        | 308 (34%)      |        |
| 2                                                   | 204 (72%)      | 979 (76%)        | 841 (70%)        | 609 (66%)      |        |
| <b>ECMO</b>                                         | 14 (4.9%)      | 52 (4.0%)        | 67 (5.6%)        | 47 (5.1%)      | 0.33   |
| <b>IABP 48 hour preop.</b>                          | 61 (22%)       | 399 (31%)        | 398 (33%)        | 323 (35%)      | <0.001 |
| <b>Cardiac arrest preop,<br/>n(%)</b>               | 22 (7.7%)      | 73 (5.7%)        | 74 (6.2%)        | 80 (8.7%)      | 0.027  |
| <b>Preoperative Inotrope</b>                        | 101 (95%)      | 393 (93%)        | 330 (90%)        | 394 (88%)      | <0.001 |
| <b>Preoperative<br/>vasopressor†, n(%)</b>          | 27 (10%)       | 111 (9%)         | 164 (14%)        | 117 (13%)      | <0.001 |
| <b>Ventilator support 48<br/>hours preop., n(%)</b> | 28 (10%)       | 96 (7%)          | 122 (10%)        | 86 (9%)        | 0.097  |
| <b>Renal replacement,</b>                           | 11 (3.9%)      | 30 (2.3%)        | 44 (3.7%)        | 44 (4.8%)      | 0.018  |

|                                       |               |                |                |                |        |
|---------------------------------------|---------------|----------------|----------------|----------------|--------|
| n(%)‡                                 |               |                |                |                |        |
| <b>Creatinine, mg/dL</b>              | 1.39±0.04     | 1.43±0.02      | 1.41±0.02      | 1.51±0.03      | 0.014  |
| <b>INR</b>                            | 1.2 [1.1,1.4] | 1.2 [1.1, 1.4] | 1.2 [1.1, 1.4] | 1.3 [1.1, 1.5] | 0.002  |
| <b>Albumin, g/dL</b>                  | 3.2±0.04      | 3.3±0.02       | 3.2±0.02       | 3.3±0.02       | <0.001 |
|                                       |               |                |                |                |        |
| <b>BiVAD (simultaneous with LVAD)</b> | 4 (1.4%)      | 48 (3.7%)      | 67 (5.6%)      | 58 (6.3%)      | 0.001  |
| <b>Continuous flow, n(%)</b>          |               |                |                |                | <0.001 |
| Cf-Af                                 | 264 (93%)     | 1064 (83%)     | 890 (74%)      | 714 (78%)      |        |
| Cf-Cf                                 | 20 (7%)       | 226 (18%)      | 307 (26%)      | 203 (22%)      |        |
| <b>Bypass Time, min</b>               | 108±2.9       | 101±1.4        | 102±1.6        | 91±1.6         | <0.001 |
| <b>Concomitant surgery, n(%)</b>      | 138 (49%)     | 548 (43%)      | 558 (47%)      | 491 (54%)      | <0.001 |
| <b>Total Months Support</b>           | 12 [5.7, 22]  | 13 [5.6, 23]   | 14 [6.1, 22]   | 12 [5.6, 21]   | 0.030  |
